# Supplementary material
Source: Springer Nature journal article supplement (https://www.springermedizin.de/resource/supplementary/12885_2013_4478_MOESM5_ESM.pdf/9466528)

**A**

Hs578T

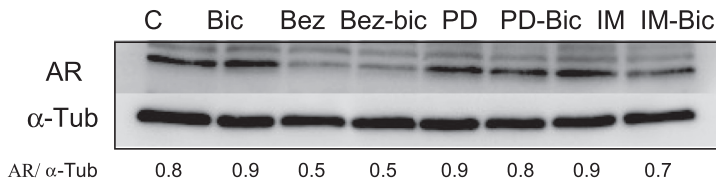

BT549

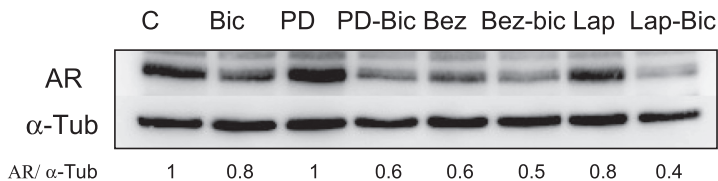**B**

Hs578T

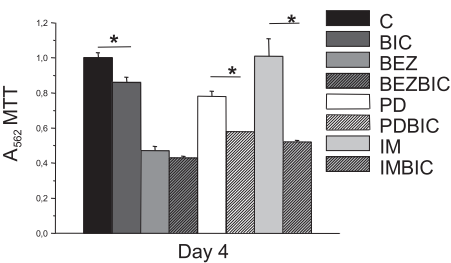

BT549

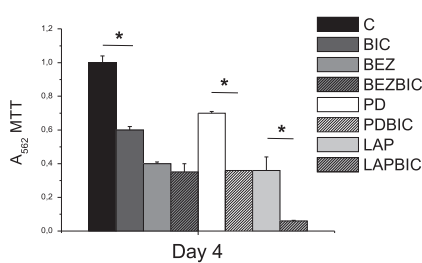**C**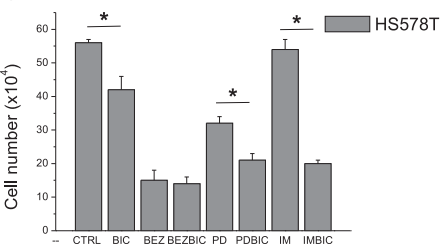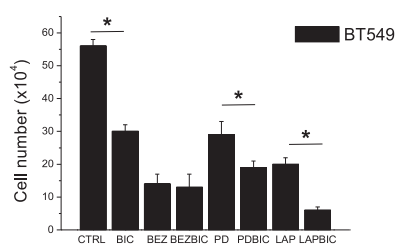

Supplement: MOESM5 [file 9466528]
